# Supplementary material for: Selection of Reference Genes for Real-Time Quantitative PCR in Pinus massoniana Post Nematode Inoculation
Source: PLoS One. 2016 Jan 22;11(1):e0147224. doi: 10.1371/journal.pone.0147224 (PMC4723224; doi:10.1371/journal.pone.0147224)
Supplement: S2 Table — (XLSX) [file pone.0147224.s003.xlsx]

## Sheet: Sheet1
#GeneID	sequence	primer forward	primer reverse	primer length
ABC transporter	GGAAAATAAGCAAGGAATAGCCTTCACTGTATACAATTTGGAAGTCAGCTTCGCAGTGGAAGCCCGTCATTTGGGACAACATCGGCGGTAAGGACAGAATCATCCATGCTGGCCGGACACTGGAAGATTTATAAAAGGCCATTAAATAATGGAGCATCATATGCCCAACAGTTTGCACGTCTCTGGGAAAGTTGGGAAACTTACAAAATCACAGCCCGGGAATACATGAATGCGATGCTGTGAGTATGTGATGAAATAGCTGAACAAACTTACAACACCCATCTGCTACTAATTTCTCTGTGCGGAAAGCCATTACTGAGTAGTTGGACAGTATGGAGGCTGAAATGAGTGTCAATGCCAATGGGAAACCAGAAAAAGAAGAGGAGAAGGAAAATGAGA…	AGCATGATCAAACGGAAGCC	GCTGGCAGGAATAGAAAGGC	159
ACT	GAATCCCAAGGCAAACAGAGAGAGGATGACTCAAATCATGTTTGAAGTCTTTAACACTCCTGCTATGTATATTGCTATTCAAGCTGTGCTCTCTCTTTATGCCAGTGGAAGAACTACAGGTATTGTTCTAGATTCAGGAGATGGTGTCACTCATGTTGTTCCCATCTATGAAGGCTATGCCCTCCCACATGCAATCTATAGAGTGGACCTTGCAGGTAGAGACTTAACTAATGCACTATGCAATATCCTGACTGAGAGAGGTTACTCCTTCACTACAACAGCAGAACGAGAAATAGTTCGAGACATAAAGGAAAAATTGGGATATGTTGCAATGGATTATGAAAAGGAGCTGGAACTGGAAAAGACCTCTACTGCATTGGAAAAGACTTATGAGCTTCC…	CCAAGGCAAACAGAGAGAGGA	TTGCATGTGGGAGGGCATAG	189
AK	TTGCTAACAAATTTACAACCACTGACCTGAACATTACAAGGTTAATATTTAAACGAGTCAAGAGAGAAAAACCTGACGAGAACAGCTGGCAATGAAGCGAATATTATGTGCATAGGTCAAGAAACTCAGGTATCTGGGGTGTCAGTGACAAAAGAACTAGTACACTGTACAATACAATAACACACTGTTAAGAGACATTTTCAGTGCTCACCTTTCACCCCCAACGATAAGAACAGCACATGTACCAGTTGGTTTTGTTTCATCCTCATAATAATGCACATTGACTCCAGCGGCTTTTGAATTTTTCTTCATCTCTGCCCCAAACTTGTCCTTGCCAATGCACCCAATGTAGCTTGTTGCACCGGGAACTTGGAGGATCCACTGTGCAACCTTGATAGA…	TCTCTGCCCCAAACTTGTCC	CAACGCGATATTGGCAGAGC	185
CAC	GAAGTTTTTGTTGATGTCATTGAAAAAATAAGTGTAACATTTAGTGCTAGTGGCTATATTCTGACATCTGAGATTGATGGGACCATTCAAATGAAAAGCTATCTGACAGGCAACCCTGAAATTCGACTGGCCCTAAATGAGGACTTGAGTATTGGGCGAAGTGGCCATTCTAGCTATGATTATAGCAGCTCATCTGGGGCAGGCATGGTAATTTTGGATGACTGTAATTTTCACGAATCTGTCCGCCTCGACAACTTTGATTTGGATCGAACACTGACTCTGGTGCCCCCGGATGGAGAATTTCCAGTCATGAATTACCGCATGACTCAAGAGTTTAAGCCTCCATTTCATGTCAATACTTTGATTGAAGAAGCTGGTTCTTTAAAGGCAGAAGTTATG…	TACTGCTAACACGGTTGCGT	TGCTCAGAACCACCGACAAT	159
EF	TTCTGGTTGCGAGAACGAGTTCGTTGGCTTTGCTTCCGACTTCAAGTGGGTCAGAGTTCTGAATTTGCCAGTGATCAAATACACATTGTGGGAAGGCTTGTCCAGAGGTGTGTGAGCGGAGATCAGCTGTGAAACCAAAGGATTCCATGACAGGCAGGTAAGCCTTAACCATGTACAATGGAGTTCCCATCTTTTGCTCCTCTGCGAACACGTGTCCACGACGACGATTGAGTGTGGAGTAAATTCCTCCCATTGCTGATTCAGGACATTGGATTTCTACAAGGTAGATAGGCTCCATAAGACGAATGTCAGCGGTAAGCATAGCTGCGTAGCATACACGACGAGCAGTTGGGATAATTTGACCACCTCCTCTGTGAATTGCATCAGCGTGAAGTGTGA…	AGCGTGAAGTGTGACATCGT	GTCCAGATTCAAGCGGACCT	176
eIF-4	GTTTTCCTGAAGCCCCATGGAGTCAAAAGTTTCATGAACCTCCTCCCAGGTAGAGTAAAGTTCTTCTCCTCCAAGGACGCTCTGCATGTTTTTGTCATAGCTCTTGGCGTCGAAGTTGTTTCCGGCCGGATCCGCAGCTGCCATTTCCTAGTTTTACCTTTTCGCTGAGAAACCCTTGATCTGCAGTAGTATTGTAATAAACCCCCTCAAAGATCAAAAAACAATACAGAGGCCCTTAAAGGAAGCGAGGAAATCTATCTATCCGGGACTGAATTAACGGAGAGAGGCCGAGTTAC	CTGAAGCCCCATGGAGTCAA	GCAGATCAAGGGTTTCTCAGC	178
HSPs	TTACTTCAAGCACAACAATTTCTCCAGCTTCGTCCGGCAGCTTAATACATACGGATTCCGCAAGATTGTTCCGGACCGTTGGGAGTTTGCTAATGATTGTTTCCGGAAAGGAGAAAAGCAGCTGCTCTGCGAAATTCATAGAAGAAAAAGCGTCCAGCAATCTTCAGCAGCCCCTGCTAGCAGATGCGTTTCGCCGGTCAATTCTGTCGAAGAGCAGGCATTGTCTTCGACCTCCTCCCCTGTTTCTTCTCCCGCAGAGGCGGCGTTAGTTAATTGTGGTCAAAATAGCACATCCGGGCTCCATGGTGAAAATGAAAAACTCAGAAAAGATAATTTGCTTCTCATGTCAGAGCTGGCACAAATGAAGAAACAGTGCAACGATCTCCTCCTGTTTCTGTC…	AAAGAGCACCGGTGGAAGAG	TTTCCTCGTGCGGCATATCA	194
Histone3	CGTCTCAGAGGGCACAAAGGCCGTCACCAAGTTCACCAGTGCCTGAACTCGGTATTGTCTTTGAATTAATTTAAATGGTGTTTTTTGACACCACAGTTACTGTGGAACTTTGAATGCAACCTTTTGAGTTTTAGCTTTTGATTCTAATTGTATGTGGTTTGTGTGGGGTTGGGTTTAGGGGCCATGGGGCTTTGAAACAGTTTTTGGAGGCTCGCCCTTTCTTTTCTATGGCGTATATGTTTCTGGTGTTGGATTCGAGGGCTGTGGATTGGTACTCTATTTTCGAATTGCTTATATCATTTTAAACCTATTTTATTTTCATTATAATTTTGAAAGAGTTTGGATTGGAACAAATTGAAATGCTGTAAGCATCATATTGCTATTCGGAATCCTCAAGAA…	TGTGGTTTGTGTGGGGTTGG	CCAATCCACAGCCCTCGAAT	120
HMGR	TGGAGCCCTGGTCATCCCATCTTTCAAAAGAATGCTAGTAGCCCCACCTGACTGGTAAATTGCCTTGCATCCTCTATTAGTACTGGCAACGAGACAACCCTCTGTGGTGGCCATGGGGACAATGTAGTCCATGCCATCGAGCAGCAGAGGCCCAACCACACCCACAGGAACCTTTACATACCCCACAGGCAACTCGCAGCATTGCCCCAGAATGGACTCGTAATCAAAACCCTCCAAAGGAAGCCCCTCCAAAGAATTCCCGGTAATGATTTCCACCGCCCTGCGCCTCACAGAAGCCGCCCTCTTGCAGTCCCCGAACCTTGACTCCAACGAATGAGATGCCACACTTCCATTGACAACAGCCAATGCAATATCTTCGTCACTATTGCTATCAATCAG…	GGCGATCCCAAAGAATCCCA	TCTGCCTCTTCCCGTTACCT	196
U2af	TGTGCCCACGAAGTCACCTCCCGACTACCTGTATTACCTGTCTTCTTAGTTTCTATAAGAGTTTTGTCCGTTCGAGGGATGTGGTGGATCATGGCTCTGTCATCTCGGGAGGTTGGGTCTACATTTGCAAACGGAGATGGGTCGTCCTCTCATGTTGCACTTGAGCGATCCGACTTCACTTACACCTCTCAATACTGGTGCCATTGTGGAATCAGAAGGCCAGCAAGGGGACTGAAGGACTGGTGATATGGGATTACCATGTAATTTGTGTTCAGAAAACGACAGAAAAGGATACCCAATTTCAAGTGTGGGATTTGGATACAGTGCTTCCATTCCCTGTCCCATTGCATCAATACATCACTGAAGCAATCCGACCATCTTTGCCTTTGCATCGAAAGT…	TCGGGAGGTTGGGTCTACAT	ACCAGTCCTTCAGTCCCCTT	140
UBC	TTTTAATTCCTGTAACTATCACCCCAAAAATCGCTTTGAACAACTGAATTAGTTTTAGTACCACGGATATTAGGAGAACGCTTTATACAACAAAAACTTATGTTTTATAAAAGAACAGAATATATTAATATTATGCACAGGGGCTCATCCGATGCTCATGAGTGCAGATTAGATATTCTGCTAATACACAAAGCATAGAGAAAACTTAAATATGTCCAAACCTATGTATTACAAGTGTGAAGTATCTAATAGTTTGCAGCATATTTTTGTGTCCAAGCCCTCGCAGTCTCTTCATAACGAGCTCGGTTAGTCTTGTAAACATGAGCAATCTCAGGCACCAAAGGGTCATCCGGATTGGGGTCAGCCAACATGGAACAAACTGATAGCAGGACCTTGGAA…	AGGAGTATCAGCAGGACCCA	TTTGGGTTGGCGCTGAATTG	187
β-TUB	GGATGAGATGGAATTCACTGAAGCTGAAAGTAACATGAATGATTTGGTCTCTGAATATCAGCAATACCAGGATGCTACCGCTGAAAATGACGACTATGAAGATGAAGAGCAAGAGCAAGAGTTGTCTGGTTAGATATATAAAGATATAATGGGGTTTATGTATGGTTTCATTGTAATGGCTTCGGGTTATGATTATGGCGGAGCCGGCGTGCTTTTTATTTCATAGGTATTACGAAGGTTTTATATTTACTTCCTGGTATAGCTGGTGTTCCTTGGATTATGGCCCGGCTTGTTTATTTCTGGGAGATTTGTTGTGTACTATATATTGGTAGTGTGTTGTTTTAAATAAATATGTTTTGGCAAGTTGCAGAGGATTTGCATTTTATTCCGAGCTATTGC…	GTCGTGAATCATGGCATGGC	GCCTCACTATCGGTTTCCCA	191
